# Supplementary material for: Gut microbiota of preterm infants supplemented with probiotics: sub-study of the ProPrems trial
Source: PubMed Central journal article supplement (PMC6234596; doi:10.1186/s12866-018-1326-1), 2018-11-13

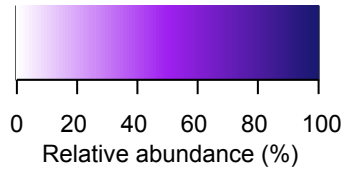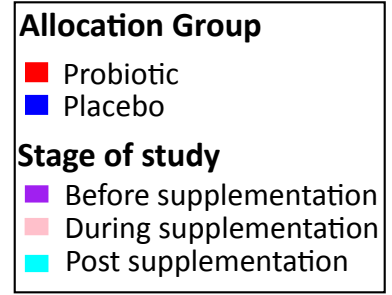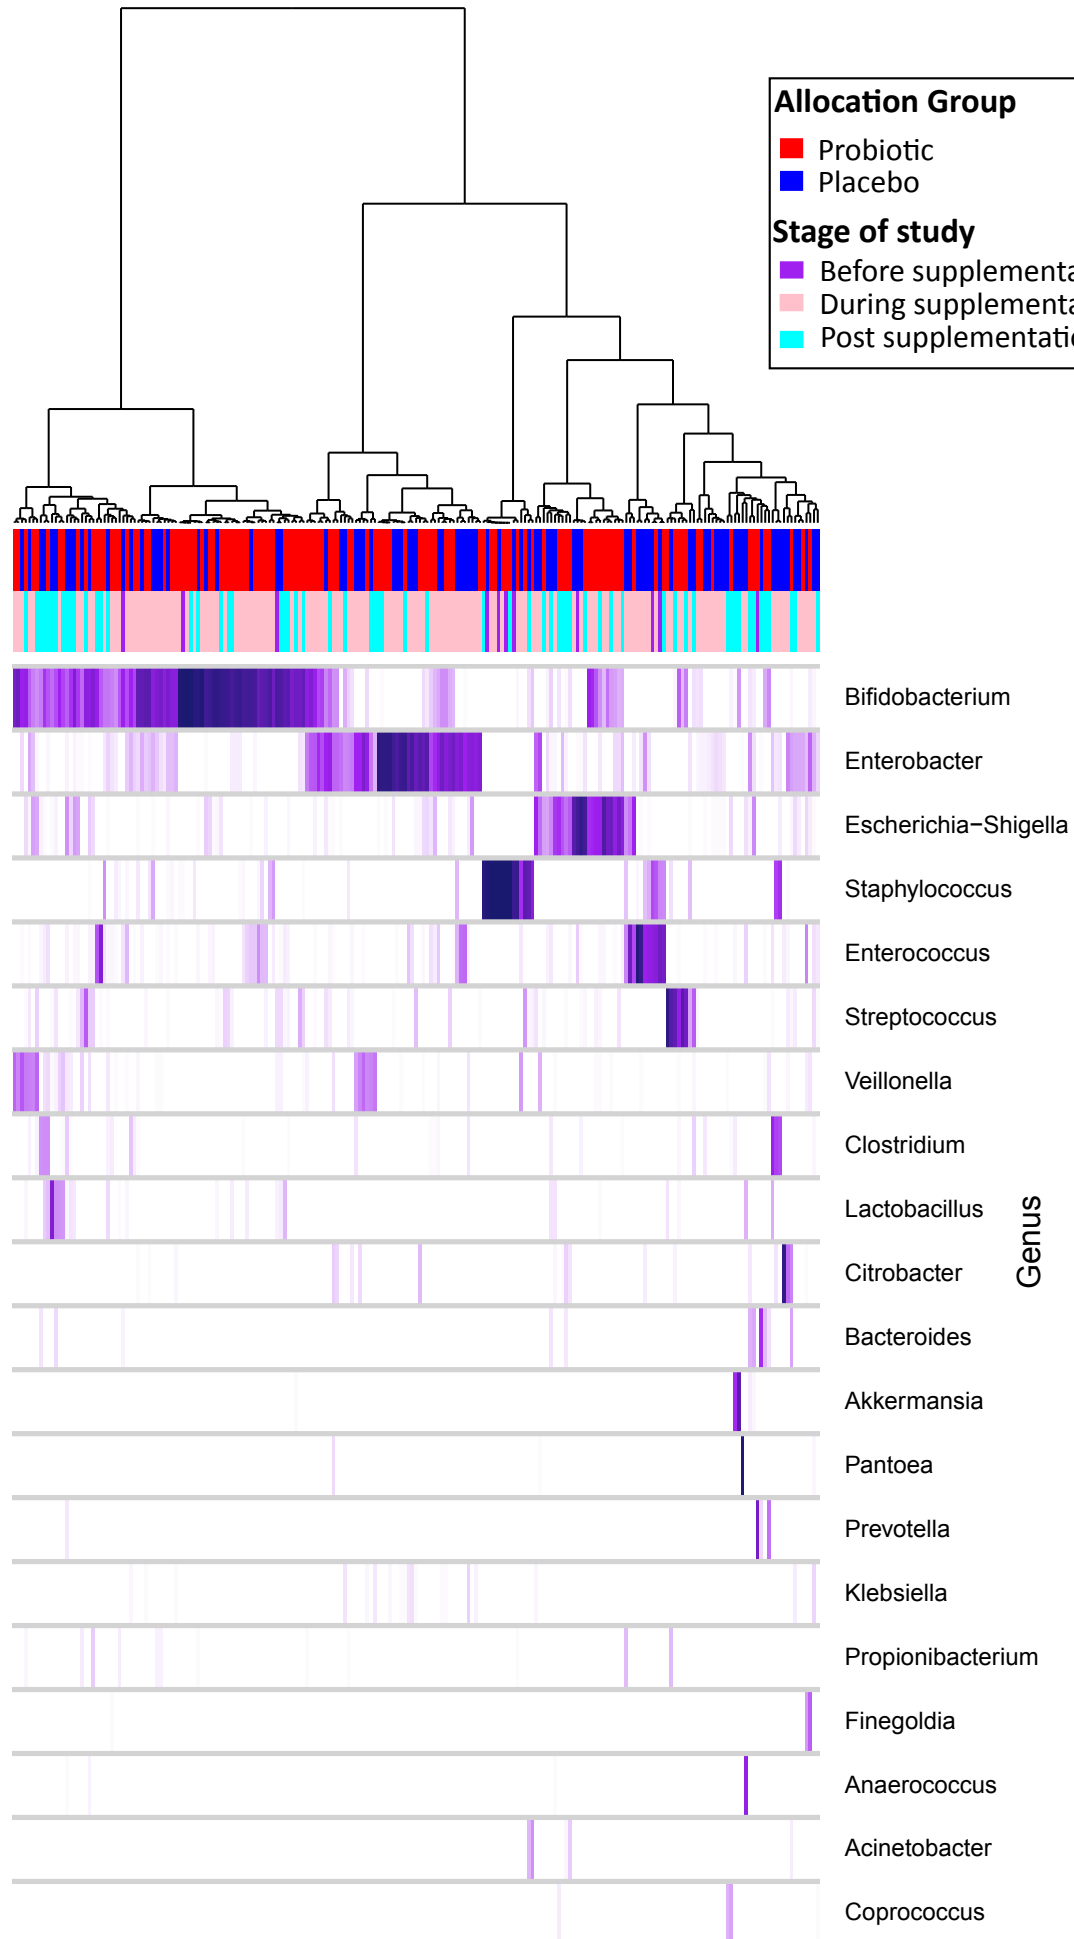

Supplement: 12866_2018_1326_MOESM2_ESM.pdf [file 12866_2018_1326_MOESM2_ESM.pdf]
